# Supplementary material
Source: PubMed Central journal article supplement (PMC6437544)
Supplement: AAC.02602-18-s0001.pdf [file AAC.02602-18-s0001.pdf]

1 **Supplementary materials**

2 Contents:

3 - Materials and methods – additional detailed material and methods

4 - Tables (S1-S3 and S6) – Tables S4 and S5 are included as separate xlsx files

5 - Figures (S1-S7)

6 - References

7

8

9

10

11

12

13

14

15

16

17

18

19

20

21

22

23

24 Materials and methods

25 Study population

26 During 2014-2016, the Minnesota Veterinary Diagnostic Laboratory (MVDL) cultured and  
27 tested for antimicrobial susceptibility 1,597 isolates belonging to 75 nontyphoidal *Salmonella*  
28 (NTS) serotypes collected from swine clinical samples of multiple sources originating mainly  
29 from the U.S. Midwest (Illinois, Indiana, Iowa, Kansas, Michigan, Minnesota, Missouri,  
30 Nebraska, North Dakota, Ohio, South Dakota and Wisconsin). Isolates were routinely tested for  
31 antimicrobial susceptibility using a panel of 17 antimicrobials, including enrofloxacin and  
32 ceftiofur. Among them, 513 isolates (32.12%) belonging to 42 serotypes were resistant to either  
33 enrofloxacin (n=169), ceftiofur (n=191) or both (n=153). For the purpose of this study, a subset  
34 of 183 isolates of 17 NTS serotypes were conveniently selected based on their resistance profile  
35 (**Table S4**). These isolates were: i) resistant to either enrofloxacin (n=49), ceftiofur (n=30) or  
36 both (n=29); or (ii) susceptible to both (n=27). In addition, previously obtained WGS  
37 information for 48 *S.* 4,[5],12:i:- isolates: i) resistant to either enrofloxacin (n=7), ceftiofur (n=5)  
38 or both (n=4); or (ii) susceptible to both (n=32), cultured from swine samples from the Midwest  
39 during 2014-2015 (described in Elnekave et al. (1)), was included in this study. Overall, the  
40 selected isolates represented similar percentage of isolates from the Midwest (approximately  
41 80%; **Table S6**) and of isolates collected during 2015 (approximately 80%) as was found among  
42 all 513 resistant isolates collected in the MVDL during that period (data not shown). In addition,  
43 the selected isolates represent different swine systems, farms, and locations within the systems  
44 (data not shown).

45 The initial number of isolates used for this study was 185. However, two isolates with low  
46 quality assemblies (see below; **Figure S1**) were removed and not included in the final analysis.

47 The sample processing of all study isolates (apart from the 48 *S.* 4,[5],12:i:- isolates from the  
48 previous study) was as follows: During 2014-2016, samples were recovered at the MVDL and  
49 antimicrobial susceptibility tests were conducted at the time of administration. Samples were  
50 then stored at minus 80°C until September 2017. Thawed isolates were streaked on MacConkey  
51 agar and a single colony was selected and grown in Luria-Bertani (LB) broth. DNA extraction  
52 was conducted using the DNEasy Blood & Tissue kit (Qiagen). Extracted DNA was then  
53 transferred to either the Minnesota Health Department (MDH; n=83) or the University of  
54 Minnesota Genomics Center (UMGC; n=54) for whole genome sequencing (WGS). Illumina  
55 MiSeq (2x250bp, paired-end reads) and Illumina HiSeq 2500 High-Output (2x125bp, paired-end  
56 reads) platforms were used for WGS at the MDH and UMGc, respectively.  
57 Following assembly (below), in-silico serotyping was applied to all strains, using *Salmonella* In  
58 Silico Typing Resource (SISTR) platform (v1.0.2; (2)). The in-silico serotype in agreement  
59 between the three identification systems within SISTR was compared with the isolate serotype.  
60 In case of disagreement, the in-silico serotype was used (except for *S.* Typhimurium var 5-,  
61 which SISTR was not able to differentiate from *S.* Typhimurium). This approach was in  
62 agreement with the phylogeny (**Figure 1**).

63

64 Core genome alignment and phylogeny construction

65 For the purpose of phylogeny construction, the Single Nucleotide Polymorphism (SNP) detection  
66 was as described in detail by Elnekave et al. (1). The following thresholds were used for variant  
67 calling: coverage threshold of eight, a minimum average base quality (Phred score) of 30, and a  
68 90% agreement threshold.

69 Identification of resistance mechanisms

70 Paired-end Illumina reads were initially filtered, based on their quality, using FASTQC (v0.11.5;  
71 (3)) and *de-novo* genome assemblies were conducted using ‘SPAdes’ (v3.12.0; (4)) with the  
72 default setting. For estimating the contig quality we used QUAST (v4.6.3; (5)) and selected for  
73 further analysis only isolates with raw reads that resulted in assembled contigs with N50 of at  
74 least 30,000 nucleotides. In addition, we used Bowtie2 (v2.3.4.1; (6)) to align the raw reads to  
75 the contigs and BBmap (v38.06; (7)) to calculate the average coverage of the contigs. Only  
76 isolates with average coverage higher than 20 were further analyzed.

77 Multi Locus Sequence Types (MLST), plasmid replicon types and the presence of acquired  
78 antimicrobial resistance genes (AARGs) were determined using the webserver workflow of the  
79 ‘bacterial analysis pipeline’ at the Center of Genomic Epidemiology  
80 (<https://cge.cbs.dtu.dk/services/cge/>). For this purpose, the assembled contigs of each isolate  
81 were concatenated and then uploaded to the webserver, where the pipeline executes a workflow  
82 of the following services: Contig Analyzer (v1.0), KmerFinder (v2.1; (8, 9)), ResFinder (v2.1;  
83 (10)), MLST (v1.6; (11)), PlasmidFinder (v1.2; (12)) and pMLST (v1.4; (12)). As the  
84 concatenated contigs of each isolate were used as an input, the CGE output was provided per  
85 isolate and not by the specific contigs of each isolate. We therefore had to use BLAST in order to  
86 localize the AARGs on specific contigs (see below).

87 In addition, mutations in quinolone target enzymes (*gyrA*, *gyrB*, *parC* and *parE*) and efflux  
88 pump regulation genes (*acrR*, *ramR*, *marR* and *soxR*) were identified using a local BLAST  
89 (v2.4.0+; (13)) as described in detail previously (1). Gene alignments were visualized using  
90 AliView software (v1.18; (14)).

91 For the purpose of this analysis, all chromosomal mutations were considered to be potentially  
92 contributing for resistance. However, for chromosomal mutations that were found in at least 15

93 isolates, we evaluated the associations between the detection of mutation and the phenotypic  
94 resistance to enrofloxacin using Fisher exact tests (statistically significant when  $P < 0.05 / 7 =$   
95  $0.007$  (Bonferroni's correction to account for multiple testing); **Table S3**). Non-significant  
96 associations between phenotypic resistance to enrofloxacin and the chromosomal mutations  
97 T717N in *gyrB* and T57S, S255T, S395N, A469S and T620A in *parC* were found and these  
98 mutations were excluded from the analyses.

99

#### 100 Identification of the plasmids harboring AARGs

101 A local BLAST (v2.4.0+; (13)) was used to identify the contigs containing the AARG genes in  
102 each isolate (for this purpose, nucleotide fasta files were downloaded for the query genes from  
103 ResFinder (v2.1; (10)). These contigs were then BLASTed (online) against the NCBI repository  
104 (NCBI nt) and the first ten matches were recorded. Then, for each AARG, a matrix containing a  
105 list of contigs (each represent a single isolate, as none of the isolates harbored more than a single  
106 copy of an AARG) and their BLAST matches was created. We counted the total number of  
107 isolates in which a specific match was identified. Then, the accessions of all matches found to be  
108 present in at least 10% of the isolates for each AARG, were screened (using free-text search) on  
109 the NCBI 'GenBank' to identify matches from plasmids which also contain the AARG name or  
110 resistance to the AARG antimicrobial family. For this purpose the following search words were  
111 used: "plasmid"; "*qnr*"; "aac(6)"; "*bla*" (including only *bla<sub>CMY</sub>*, *bla<sub>CTX</sub>* or *bla<sub>SHV</sub>* genes);  
112 "resistance"; "cephalosporin" (with specific indication of extended spectrum resistance); and  
113 "quinolone". The plasmid sequences of the filtered BLAST matches were downloaded from  
114 NCBI (as FASTA files) and for each AARG, the raw short-reads of the isolates were aligned  
115 (using Bowtie2 v2.3.4.1; (6)) to these plasmid sequences. In these alignments, we took a

116 conservative approach and base locations with less than eight bases aligned (BEDTools v2.27.1  
117 (15) was used to retrieve the coverage per location) were regarded as locations with coverage  
118 depth of zero. We then calculated the alignment's coverage breadth percentile using the  
119 following formula (1):

$$120 \quad (1) \quad \text{coverage breadth (\%)} = 100 \times (\text{reference genome length} - \# \text{ of positions with zero coverage}) \\ 121 \quad \quad \quad / \text{reference genome length}$$

122 Therefore, the absolute coverage breadth formula was (2):

$$123 \quad (2) \quad \text{absolute coverage breadth} = (\text{breadth coverage (\%)} \times \text{reference genome length}) / 100$$

124 Finally, for each AARG, the following information from each isolate mapped to a reference  
125 plasmid was summarized and compared: 1. coverage breadth (%), 2. absolute coverage breadth,  
126 3. number of SNPs.

127 For each AARG gene, reference plasmids whose alignment had the highest coverage breadth  
128 percentage (top two) or highest absolute coverage breadth (top two) were selected out of the  
129 reference plasmid alignments in which at least 60% coverage breadth and less than 200 SNPs  
130 were found (SNPs were identified using SAMtools v1.9 (16) and VarScan v2.4.3 (17)). The  
131 selected reference plasmids were then considered as possible plasmid sequence containing the  
132 AARG. If similar alignment scores were obtained for multiple plasmids in the same isolate, all  
133 plasmids were grouped together (**Table S5**). In addition, in some cases, short plasmid references  
134 had high coverage depth percentage and a low number of SNPs. Yet when these short plasmid  
135 references were blasted against plasmid references with the high absolute coverage breadth that  
136 were identified in the same isolate, we found that certain regions in the small plasmid reference  
137 sequence were present in multiple locations along the longer reference plasmid sequence.

138 Therefore, these short reference plasmids were not regarded as possible plasmids and were  
139 excluded from the analysis.

140 In all analyses, the default settings were used for BLAST against the NCBI repository. Yet, for  
141 the local BLAST a threshold for positive detection was set to at least 90% identity and more than  
142 60% coverage of the query sequence following the cutoffs used by ResFinder (v2.1; (10)).

143 In addition, we have screened (using free-text search) the U.S. Food and Drug Administration  
144 (FDA), NARMS Now (FDA. NARMS Now. Rockville, MD: U.S. Department of Health and  
145 Human Services;  
146 [https://www.fda.gov/animalveterinary/safetyhealth/antimicrobialresistance/nationalantimicrobial](https://www.fda.gov/animalveterinary/safetyhealth/antimicrobialresistance/nationalantimicrobialresistancemonitoringsystem/ucm570685.htm)  
147 [resistancemonitoringsystem/ucm570685.htm](https://www.fda.gov/animalveterinary/safetyhealth/antimicrobialresistance/nationalantimicrobialresistancemonitoringsystem/ucm570685.htm). Accessed: 06/18/2018) surveillance program in  
148 slaughterhouse findings to identify of 19 *Salmonella* isolates recovered from swine cecal samples  
149 between 2013 and 2015 that harbored *qnrB19*. Their raw-reads were downloaded and the  
150 plasmids were characterized based on the short-read assemblies (see manuscript for results).

151 Three and ten of these isolates were previously described by Tyson et al. (18) as harboring  
152 plasmids in the sizes of 2,699bp and 3,071bp, respectively. Using our multi-step approach  
153 described above we identified plasmids from group I (including plasmids of 2,617 - 2,826bp) and  
154 group II (including plasmids of 3,071 - 3,082bp) for these three and ten isolates, respectively.

155 The consistency between our findings and those reported by Tyson et al. (18) in independent  
156 analyses strengthens the validity of the approach taken here.

157

158 Pacific Biosciences (Pac-Bio) sequencing

159 Ten isolates were selected for Pacific Biosciences (Pac-Bio) sequencing based on their serotype  
160 and the plasmids that were identified in those using the short-read (illumina) assembly. Pac-Bio

161 sequencing provides long sequences, yet with high error rate (19). Therefore, LoRDEC v0.9  
162 ((20); with k-mer size=19 and abundance threshold=2) was used for long-read error correction  
163 by mapping the Illumina short-reads to them and using the short-reads to correct unmapped  
164 regions along the path of the de Bruijn graph. Then a *de-novo* hybrid assembly was performed  
165 using Unicycler (v0.4.4; (21)) (with the default settings and depth filter=0.1%), using both  
166 Illumina short-reads and corrected Pac-Bio long-reads. Bandage (v0.8.1; (22)) was used for  
167 assembly visualization and a built-in BLAST (in Bandage) was used for detection of the AARGs  
168 and the plasmids harboring them. Short repetitive sequences (approximately 25bp long) were  
169 removed. For long-read plasmids smaller than 10,000bp, nodes with average coverage lower  
170 than 14 were removed. The final FASTA files containing the long-read plasmid sequences were  
171 then saved and used for further analyses. The plasmids identified via long-read assembly were  
172 then compared with the plasmids identified from short-read assemblies, using NCBI nucleotide  
173 megablast; and Blast Ring Image Generator (BRIG v0.95; (23)) was used for alignment  
174 visualization.

175

176 Data summarizing and statistical analysis

177 Data was summarized using Microsoft Excel and packages 'stringr' (v1.2.0; (24)), 'dplyr'  
178 (v0.7.4; (25)) and 'xlsx' (v0.5.7; (26)) in R (v3.4.3; (27)). Hmisc package (v4.1.1; (28)) was used  
179 for capitalizing the first letters in the serotype names. In addition, 'VennDiagram' package  
180 (v1.6.18; (29)) was used to create Venn diagrams and 'gridExtra' package (v2.3; (30)) for fitting  
181 multiple figures on one page.

182 In addition, collinearity between AARG pairs was assessed following Dohoo et al. (31) by  
183 creating 2X2 tables for each AARG pair and calculating the odd ratios. Odds ratio of 8-10 or



184 higher was considered as suggestive of collinearity (i.e. high correlation) between the AARG  
185 pairs.

186

#### 187 Data Deposition

188 The raw-reads from the Illumina sequencing conducted at the MDH were deposited in the NCBI  
189 sequence read archive (SRA) under BioProject PRJNA215333. The raw-reads from the Illumina  
190 and Pac-Bio sequencing conducted at the UMGC were deposited in the NCBI sequence read  
191 archive (SRA) under BioProject PRJNA505665. The long-read assemblies of plasmids harboring  
192 AARGs were uploaded to GenBank (accessions MK191835 to MK191846). The isolate details  
193 are presented in **Table S4**.

194

195

196

197

198

199

200

201

202

203

204

205 **Table S1** – Chromosomal genes in which mutations may lead to resistance to quinolones

| Mechanism                    | Gene        | Gene description                                                    | Gene coding sequences (CDS)* |
|------------------------------|-------------|---------------------------------------------------------------------|------------------------------|
| Quinolone target enzymes     | <i>gyrA</i> | DNA gyrase subunit A                                                | NP_461214.1                  |
|                              | <i>gyrB</i> | DNA gyrase subunit B                                                | NP_462735.1                  |
|                              | <i>parC</i> | DNA topoisomerase IV subunit A                                      | NP_462089.1                  |
|                              | <i>parE</i> | DNA topoisomerase IV subunit B                                      | NP_462096.1                  |
| Efflux pump regulation genes | <i>ramR</i> | Local repressor for <i>ramA</i> expression in <i>S. Typhimurium</i> | NP_459572.1 <sup>†</sup>     |
|                              | <i>soxR</i> | redox-sensitive transcriptional activator SoxR                      | NP_463131.1 <sup>†</sup>     |
|                              | <i>marR</i> | Transcriptional regulator                                           | NP_460480.1 <sup>†</sup>     |
|                              | <i>acrR</i> | DNA-binding transcriptional repressor AcrR                          | NP_459472.1 <sup>‡</sup>     |

206

207 \**Salmonella* Typhimurium LT2 (NCBI accession number: NC\_003197) served as the reference

208 genome.

209 <sup>†</sup>Abouzeed et al. (32).

210 <sup>‡</sup>Olliver et al. (33).

211 **Table S2** – Genetic resistance mechanisms (i.e. presence of acquired antimicrobial resistance  
 212 genes (AARGs) and mutations in target enzymes and the efflux pump regulation genes) which  
 213 may result in resistance to enrofloxacin, summarized by nontyphoidal *Salmonella* (NTS)  
 214 serotypes and phenotypic resistance to enrofloxacin.

| NTS serotype     | Resistance to enrofloxacin (MIC≥1mg/L) | n  | Presence of AARGs (no.)                                             | Mutations* which may result in resistance to enrofloxacin† (no.) |                  |                                                                         |                                                                      |                                            |
|------------------|----------------------------------------|----|---------------------------------------------------------------------|------------------------------------------------------------------|------------------|-------------------------------------------------------------------------|----------------------------------------------------------------------|--------------------------------------------|
|                  |                                        |    |                                                                     | Target enzymes‡                                                  |                  |                                                                         | Efflux pumps regulation                                              |                                            |
|                  |                                        |    |                                                                     | <i>gyrA</i>                                                      | <i>gyrB</i>      | <i>parC</i>                                                             | <i>ramR</i>                                                          | others                                     |
| Agona            | No                                     | 8  |                                                                     |                                                                  | T717N (8)        | T57S (8), S395N (8), T620A (8)                                          | (2)§                                                                 |                                            |
|                  | Yes                                    | 14 | <i>qnrB19</i> (1),<br><i>qnrB2</i> (1)                              | <u>S83Y (11)</u>                                                 | T717N (14)       | T57S (14), <u>S80R (1)</u> , S395N (14), T620A (14)                     | <u>A37T (1)</u> ,<br><u>Q19L (1)</u> ,<br><u>(11)§</u> , <u>(1)¶</u> |                                            |
| Alachua          | Yes                                    | 7  | <i>qnrB15</i> -like (1),<br><i>qnrB19</i> (6)                       | <u>D87G (1)</u> ,<br><u>S83F (1)</u>                             |                  | T57S (7), S255T (7), S395N (7), A469S (7), T620A (7)                    | (7)#                                                                 | <u>V213F (7)††</u> ,<br><u>S216P (7)††</u> |
| Bovismorbificans | No                                     | 1  |                                                                     |                                                                  |                  | T57S (1), S395N (1), A469S (1), T620A (1)                               |                                                                      | <u>N214T (1)††</u> ,<br><u>P217R (1)††</u> |
| Braenderup       | No                                     | 1  | <i>qnrB2</i> (1), (1)**                                             | <u>R413L (1)</u>                                                 |                  | T57S (1)                                                                |                                                                      |                                            |
| Brandenburg      | No                                     | 4  |                                                                     |                                                                  |                  | T57S (4), S395N (4), T620A (4)                                          | <u>Y92H (1)</u> ,<br><u>(1)#</u>                                     | <u>N214T (4)††</u>                         |
|                  | Yes                                    | 2  | <i>qnrB2</i> (1), (1)**                                             | <u>S83L (1)</u>                                                  |                  | <u>E51D (1)</u> , T57S (2), S395N (2), T620A (2)                        | (2)#                                                                 | <u>N214T (2)††</u>                         |
| Derby            | No                                     | 4  |                                                                     |                                                                  |                  | T57S (4), A469S (4), T620A (4)                                          |                                                                      | <u>S216A (4)††</u>                         |
| Heidelberg       | No                                     | 2  |                                                                     |                                                                  |                  | T57S (2), S395N (2), A469S (2), T620A (2)                               |                                                                      |                                            |
|                  | Yes                                    | 12 | <i>qnrB19</i> (8),<br><i>qnrB19</i> -like (1),<br><i>qnrD</i> (1)   | <u>D87N (2)</u> ,<br><u>S83Y (1)</u>                             |                  | T57S (12), S395N (12), A469S (12), T620A (12)                           | <u>H99P (1)</u> ,<br><u>I55T (1)</u> ,<br><u>(3)#</u>                |                                            |
| Infantis         | No                                     | 3  |                                                                     |                                                                  | <u>Q624K (3)</u> | T57S (3), S395N (3), A469S (3), T620A (3)                               |                                                                      |                                            |
|                  | Yes                                    | 1  | <i>qnrB2</i> (1)                                                    |                                                                  | <u>Q624K (1)</u> | T57S (1), S395N (1), A469S (1), T620A (1)                               |                                                                      |                                            |
| London           | No                                     | 1  |                                                                     |                                                                  |                  | T57S (1), S255T (1), S395N (1), A469S (1), T620A (1)                    | <u>M83T (1)</u>                                                      |                                            |
|                  | Yes                                    | 3  | <i>qnrB19</i> (3)                                                   |                                                                  |                  | T57S (3), S255T (3), S395N (3), A469S (3), T620A (3)                    | <u>M83T (3)</u>                                                      |                                            |
| 4,[5],12:i:-     | No                                     | 41 | <i>qnrB19</i> -like (1),<br><i>qnrB2</i> (1), (1)**                 |                                                                  | <u>T616I (1)</u> |                                                                         | <u>W89L (1)</u> ,<br><u>(2)#</u>                                     | <u>V110L (1)‡‡</u>                         |
|                  | Yes                                    | 17 | <i>qnrB19</i> (11),<br><i>qnrB2</i> (6),<br><i>qnrS1</i> (1), (2)** | <u>S83F (1)</u>                                                  |                  |                                                                         | <u>G180E (1)</u> ,<br><u>W89R (1)</u> , <u>(1)#</u>                  |                                            |
| Muenchen         | No                                     | 2  |                                                                     | <u>A873V (1)</u>                                                 |                  | T57S (2), S255T (1), <u>R365L (1)</u> , S395N (2), A469S (2), T620A (2) |                                                                      |                                            |
|                  | Yes                                    | 1  | <i>qnrB19</i> (1)                                                   | <u>A873V (1)</u>                                                 |                  | T57S (1), S255T (1), <u>R365L (1)</u> , S395N (1), A469S (1), T620A (1) | (1)#                                                                 |                                            |
| Ohio             | No                                     | 1  |                                                                     |                                                                  |                  | T57S (1), S395N (1)                                                     | <u>A15T (1)</u>                                                      | <u>G15D (1)§§</u>                          |
| Rissen           | No                                     | 1  |                                                                     |                                                                  |                  | T57S (1), S255T (1), S395N (1), A469S (1), T620A (1)                    |                                                                      |                                            |
|                  | Yes                                    | 2  | <i>qnrB19</i> (1), (1)**                                            | <u>D87N (1)</u>                                                  |                  | T57S (2), S255T (2), S395N (2), A469S (2), T620A (2)                    | <u>L115F (1)</u>                                                     | <u>C148F (1)††</u>                         |

|                    |     |    |                                                                                             |                                   |  |                                           |                                                                                                                    |  |
|--------------------|-----|----|---------------------------------------------------------------------------------------------|-----------------------------------|--|-------------------------------------------|--------------------------------------------------------------------------------------------------------------------|--|
| Senftenberg        | No  | 1  |                                                                                             | <u>D87N (1)</u>                   |  | T57S (1), A469S (1), T620A (1)            |                                                                                                                    |  |
|                    | Yes | 2  | <i>qnrB19</i> (1), <i>qnrB2</i> (1), (1)**                                                  |                                   |  | T57S (2), A469S (2), T620A (2)            | (1)#                                                                                                               |  |
| Typhimurium var 5- | No  | 7  |                                                                                             |                                   |  |                                           | <u>A149T (1)</u>                                                                                                   |  |
|                    | Yes | 18 | <i>qnrB15</i> -like (1), <i>qnrB19</i> (11), <i>qnrB2</i> (2), <i>qnrS2</i> (1)             | <u>D87N (4)</u> , <u>S83F (1)</u> |  | <u>S80L (3)</u>                           | <u>A40T (3)</u> , <u>R102L (1)</u> , <u>G96D (1)</u> , <u>H99Q (1)</u> , <u>T18P (2)</u> , <u>P100T (1)</u> , (1)# |  |
| Typhimurium        | No  | 15 | <i>qnrB19</i> (1), <i>qnrB19</i> -like (3)                                                  | <u>D830N (1)</u>                  |  |                                           | <u>H99Q (1)</u> , <u>P100T (1)</u>                                                                                 |  |
|                    | Yes | 4  | <i>qnrB19</i> (3), <i>qnrB2</i> (1), (1)**                                                  |                                   |  |                                           | (1)#                                                                                                               |  |
| Worthington        | No  | 2  |                                                                                             |                                   |  | T57S (2), S395N (2), A469S (2), T620A (2) |                                                                                                                    |  |
|                    | Yes | 6  | <i>qnrB15</i> -like (2), <i>qnrB2</i> -like (1), <i>qnrB19</i> (2), <i>qnrB19</i> -like (2) |                                   |  | T57S (6), S395N (6), A469S (6), T620A (6) | (2)#                                                                                                               |  |

215

216 \*Non-synonymous mutations. Those potentially associated with resistance to enrofloxacin are  
217 underscored (see manuscript, supplementary materials text and **Table S3** for clarification).

218 †Mutation locations indicated according to the amino acid (AA) location following the scheme:  
219 ['original AA'][location]['new AA']. Amino acids are presented using single letter abbreviation.

220 ‡No mutations were found in *parE*.

221 §*ramR* was not detected.

222 ¶insertion of one nucleic acid resulting in multiple stop codons in *ramR*.

223 #deletion of up to 45 amino acids in *ramR*.

224 \*\*presence of *aac(6')Ib-cr*-like.

225 ††mutation in *acrR*.

226 ‡‡mutation in *soxR*.

227 §§mutation in *marR*.

228

229

230 **Table S3** – list of the chromosomal mutations in the target enzymes and efflux pump regulating  
 231 genes that were found in this study.

| Gene                         | Mutations          | QRDR <sup>†</sup>  | All isolates              |                             | Only serotypes in which the mutation was found <sup>†</sup> |                             | Reference   |              |
|------------------------------|--------------------|--------------------|---------------------------|-----------------------------|-------------------------------------------------------------|-----------------------------|-------------|--------------|
|                              |                    |                    | Resistant (no./Total (%)) | Susceptible (no./Total (%)) | Resistant (no./Total (%))                                   | Susceptible (no./Total (%)) |             |              |
| Target enzymes               | <i>gyrA</i>        | S83F               | Yes                       | 3/89 (3.4)                  | 0/94 (0)                                                    |                             |             | (34-36)      |
|                              |                    | S83L               | Yes                       | 1/89 (1.1)                  | 0/94 (0)                                                    |                             |             | (37)         |
|                              |                    | S83Y               | Yes                       | 12/89 (13.5)                | 0/94 (0)                                                    |                             |             | (34, 36)     |
|                              |                    | D87G               | Yes                       | 1/89 (1.1)                  | 0/94 (0)                                                    |                             |             | (34, 36, 37) |
|                              |                    | D87N               | Yes                       | 7/89 (7.9)                  | 1/94 (1.1)                                                  |                             |             | (34-37)      |
|                              |                    | R413L              | No                        | 0/89 (0)                    | 1/94 (1.1)                                                  |                             |             | NA           |
|                              |                    | D830N              | No                        | 0/89 (0)                    | 1/94 (1.1)                                                  |                             |             | NA           |
|                              |                    | A873V              | No                        | 1/89 (1.1)                  | 1/94 (1.1)                                                  |                             |             | NA           |
|                              | <i>gyrB</i>        | T616I              | No                        | 0/89 (0)                    | 1/94 (1.1)                                                  |                             |             | NA           |
|                              |                    | Q624K              | No                        | 1/89 (1.1)                  | 3/94 (3.2)                                                  |                             |             | NA           |
|                              |                    | T717N <sup>‡</sup> | No                        | 14/89 (15.7)                | 8/94 (8.5)                                                  | 14/14 (100)                 | 8/8 (100)   | NA           |
|                              | <i>parC</i>        | E51D               | No                        | 1/89 (1.1)                  | 0/94 (0)                                                    |                             |             | NA           |
|                              |                    | T57S <sup>‡</sup>  | Yes                       | 50/89 (56.2)                | 31/94 (33)                                                  | 50/50 (100)                 | 31/31 (100) | (34, 37)     |
|                              |                    | S80I               | Yes                       | 3/89 (3.4)                  | 0/94 (0)                                                    |                             |             | (34)         |
|                              |                    | S80R               | Yes                       | 1/89 (1.1)                  | 0/94 (0)                                                    |                             |             | (34)         |
|                              |                    | S255T <sup>‡</sup> | No                        | 13/89 (14.6)                | 3/94 (3.2)                                                  | 13/13 (100)                 | 3/4 (75)    | NA           |
|                              |                    | R365L              | No                        | 1/89 (1.1)                  | 1/94 (1.1)                                                  |                             |             | NA           |
|                              |                    | S395N <sup>‡</sup> | No                        | 48/89 (53.9)                | 25/94 (26.6)                                                | 48/48 (100)                 | 25/25 (100) | NA           |
|                              |                    | A469S <sup>‡</sup> | No                        | 34/89 (38.2)                | 17/94 (18.1)                                                | 34/34 (100)                 | 17/17 (100) | NA           |
|                              | T620A <sup>‡</sup> | No                 | 50/89 (56.2)              | 29/94 (30.9)                | 50/50 (100)                                                 | 29/29 (100)                 | NA          |              |
| <i>parE</i>                  | -                  | -                  | -                         | -                           |                                                             |                             | -           |              |
| Efflux pump regulating genes | <i>acrR</i>        | C148F              | NA                        | 1/89 (1.1)                  | 0/94 (0)                                                    |                             |             | NA           |
|                              |                    | V213F              | NA                        | 7/89 (7.9)                  | 0/94 (0)                                                    |                             |             | NA           |
|                              |                    | N214T              | NA                        | 2/89 (2.2)                  | 5/94 (5.3)                                                  |                             |             | NA           |
|                              |                    | S216P              | NA                        | 7/89 (7.9)                  | 0/94 (0)                                                    |                             |             | NA           |
|                              |                    | S216A              | NA                        | 0/89 (0)                    | 4/94 (4.3)                                                  |                             |             | NA           |
|                              |                    | P217R              | NA                        | 0/89 (0)                    | 1/94 (1.1)                                                  |                             |             | NA           |
|                              | <i>ramR</i>        | A15T               | NA                        | 0/89 (0)                    | 1/94 (1.1)                                                  |                             |             | NA           |
|                              |                    | T18P               | NA                        | 2/89 (2.2)                  | 0/94 (0)                                                    |                             |             | NA           |
|                              |                    | Q19L               | NA                        | 1/89 (1.1)                  | 0/94 (0)                                                    |                             |             | NA           |
|                              |                    | A37T               | NA                        | 1/89 (1.1)                  | 0/94 (0)                                                    |                             |             | NA           |
|                              |                    | A40T               | NA                        | 3/89 (3.4)                  | 0/94 (0)                                                    |                             |             | NA           |
|                              |                    | I55T               | NA                        | 1/89 (1.1)                  | 0/94 (0)                                                    |                             |             | NA           |
|                              |                    | M83T               | NA                        | 3/89 (3.4)                  | 1/94 (1.1)                                                  |                             |             | NA           |
|                              |                    | W89L               | NA                        | 0/89 (0)                    | 1/94 (1.1)                                                  |                             |             | NA           |

|  |             |                        |    |              |            |              |             |                                                                                                                                     |
|--|-------------|------------------------|----|--------------|------------|--------------|-------------|-------------------------------------------------------------------------------------------------------------------------------------|
|  |             | W89R                   | NA | 1/89 (1.1)   | 0/94 (0)   |              |             | NA                                                                                                                                  |
|  |             | Y92H                   | NA | 0/89 (0)     | 1/94 (1.1) |              |             | NA                                                                                                                                  |
|  |             | G96D                   | NA | 1/89 (1.1)   | 0/94 (0)   |              |             | NA                                                                                                                                  |
|  |             | H99P                   | NA | 1/89 (1.1)   | 0/94 (0)   |              |             | NA                                                                                                                                  |
|  |             | H99Q                   | NA | 1/89 (1.1)   | 1/94 (1.1) |              |             | NA                                                                                                                                  |
|  |             | P100T                  | NA | 1/89 (1.1)   | 1/94 (1.1) |              |             | NA                                                                                                                                  |
|  |             | R102L                  | NA | 1/89 (1.1)   | 0/94 (0)   |              |             | NA                                                                                                                                  |
|  |             | L115F                  | NA | 1/89 (1.1)   | 0/94 (0)   |              |             | NA                                                                                                                                  |
|  |             | A149T                  | NA | 0/89 (0)     | 1/94 (1.1) |              |             | NA                                                                                                                                  |
|  |             | G180E                  | NA | 1/89 (1.1)   | 0/94 (0)   |              |             | NA                                                                                                                                  |
|  |             | Deletion <sup>§</sup>  | NA | 19/89 (21.3) | 3/94 (3.2) | 19/68 (23.5) | 3/74 (4.05) | (38)                                                                                                                                |
|  |             | Gene not found         | NA | 11/89 (12.4) | 2/94 (2.1) |              |             | In isolate 44 we found only 35% of the gene in hybrid assembly. Similarly Akiyama et al. (38) described 315bp deletion in this gene |
|  |             | Insertion <sup>¶</sup> | NA | 1/89 (1.1)   | 0/94 (0)   |              |             | NA                                                                                                                                  |
|  | <i>marR</i> | G15D                   | NA | 0/89 (0)     | 1/94 (1.1) |              |             | NA                                                                                                                                  |
|  | <i>soxR</i> | V110L                  | NA | 0/89 (0)     | 1/94 (1.1) |              |             | NA                                                                                                                                  |

232

233 \*the Quinolone Resistance Determining Regions (QRDRs) for *gyrA* (70-152), *gyrB* (415-470)  
234 and *parC* (47-133) were defined according to Eaves et al. (36).

235 †Including only mutations that were found in at least 15 isolates. The total number of resistance  
236 and susceptible isolates out of the number of the total isolates in the serotypes in which the  
237 mutation was found.

238 ‡not regarded as contributing the resistance.  $P > 0.007$ , when including only serotypes in which  
239 this mutation was found (Fisher exact test with Bonferroni's correction).

240 §amino acid deletions - different positions. Regarded as contributing to enrofloxacin-resistance.  
241  $P < 0.007$ , when including only serotypes in which deletions were found (Fisher exact test with  
242 Bonferroni's correction).

243 ¶the nucleotide Adenine is inserted in location 25 ->result in 3 stop codons.

244

245

246

247

248

249

250

251

252

253

254

255

256

257

258

259

260

261

262

263

264

265 **Table S6** – The distribution of the nontyphoidal *Salmonella* (NTS) isolates included in this  
266 study, summarized by state

| State          | n / total (%)    |
|----------------|------------------|
| Alaska         | 1 / 183 (0.55)   |
| Alabama        | 1 / 183 (0.55)   |
| Arkansas       | 1 / 183 (0.55)   |
| Colorado       | 2 / 183 (1.09)   |
| Iowa           | 25 / 183 (13.66) |
| Illinois       | 16 / 183 (8.74)  |
| Indiana        | 1 / 183 (0.55)   |
| Kansas         | 18 / 183 (9.84)  |
| Minnesota      | 61 / 183 (33.33) |
| Missouri       | 7 / 183 (3.83)   |
| North Carolina | 1 / 183 (0.55)   |
| Nebraska       | 14 / 183 (7.65)  |
| Ohio           | 3 / 183 (1.64)   |
| Oklahoma       | 20 / 183 (10.93) |
| Pennsylvania   | 1 / 183 (0.55)   |
| Texas          | 10 / 183 (5.46)  |
| Wisconsin      | 1 / 183 (0.55)   |

274



275 **Figure S1 –**

276 A schematic diagram illustrating the approach applied in this study

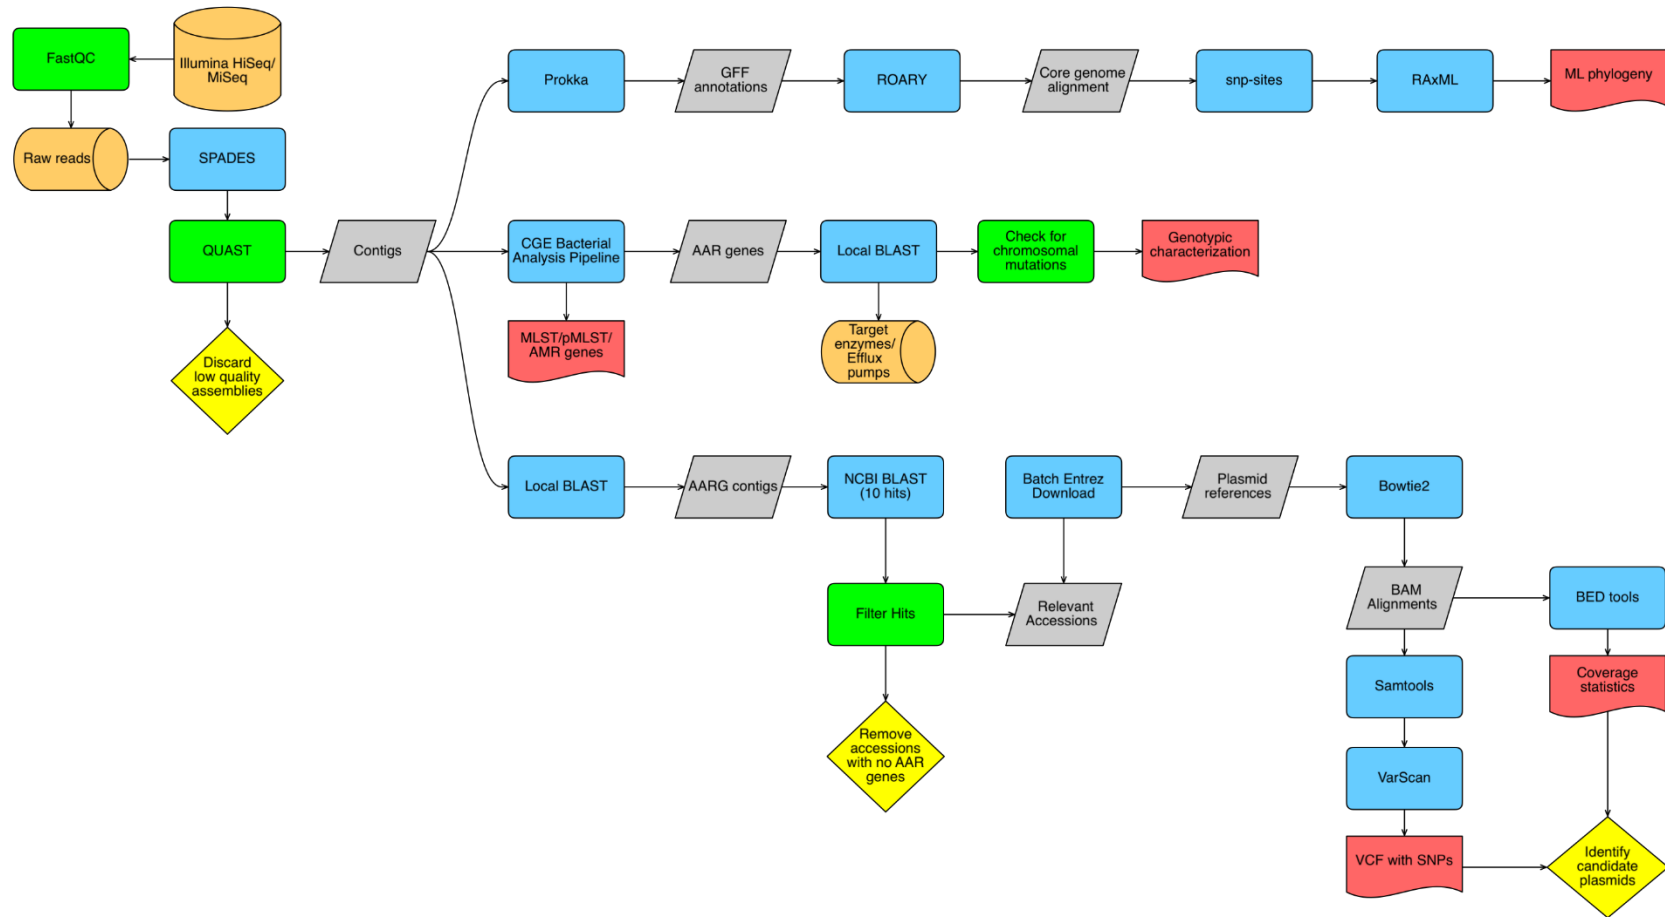

277

278 **Figure S2 –**

279 A BLAST ring alignment for short-read (Illumina) assembly plasmids and long-read (Pac-Bio)  
280 assembly plasmids harboring the *qnrD* (indicated in red). The percentage of identity for each  
281 aligned sequence with the reference plasmid (KF498970.1; inner black circle) is indicated on the  
282 legend.

283

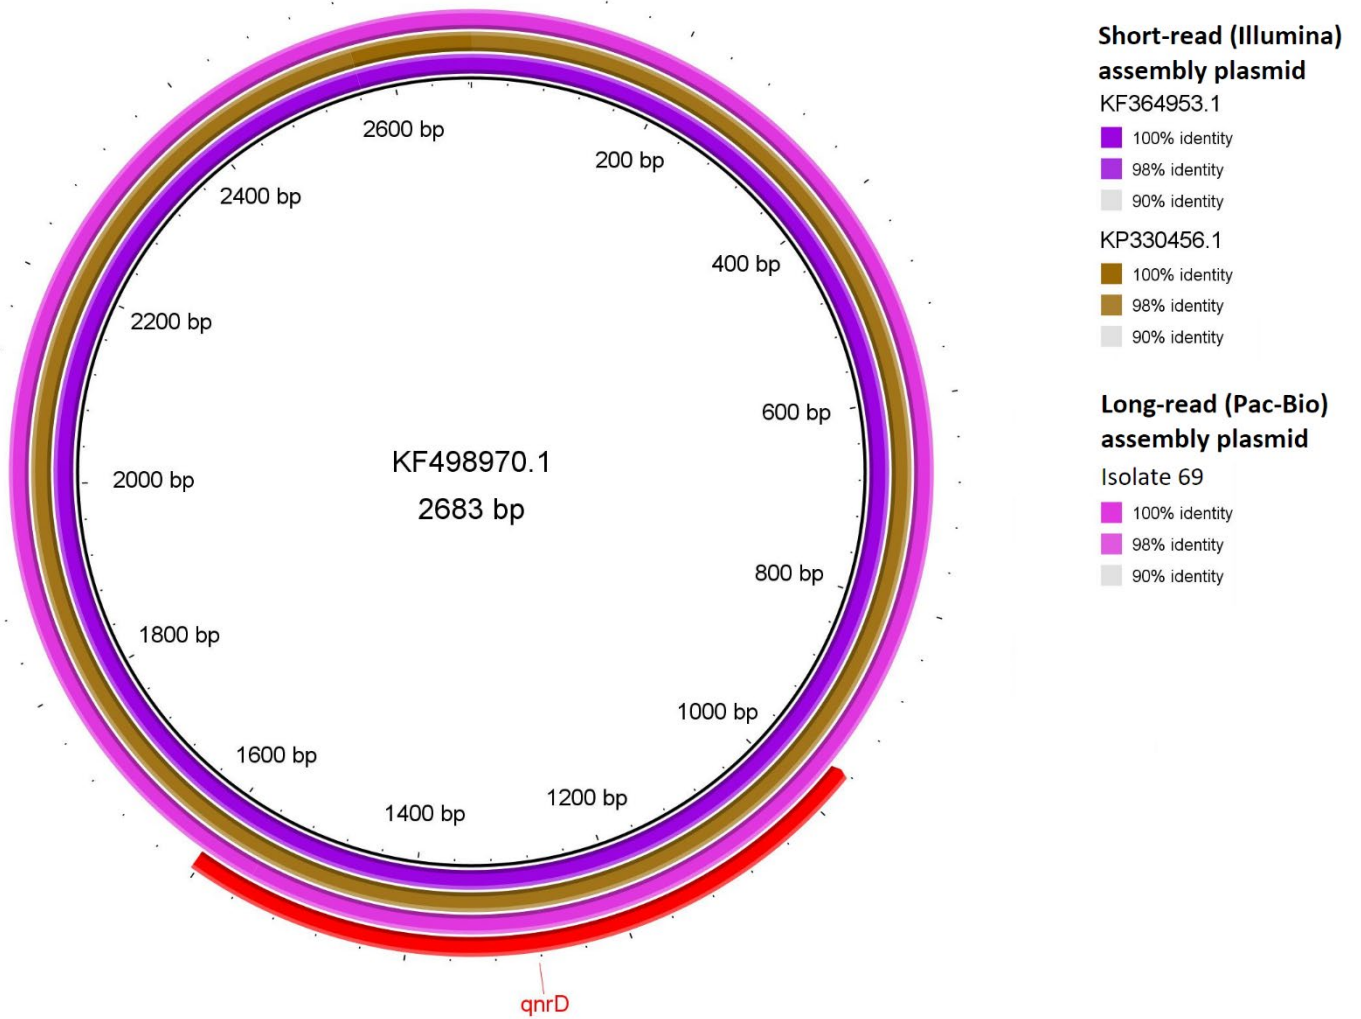

284

285

286 **Figure S3 –**

287 A BLAST ring alignment for short-read (Illumina) assembly plasmids with the long-read (Pac-  
288 Bio) assembly plasmid (Isolate\_63) harboring the *qnrS2* (indicated in red). The percentage of  
289 identity for each aligned sequence with the reference plasmid (Isolate\_65; inner black circle) is  
290 indicated on the legend.

291

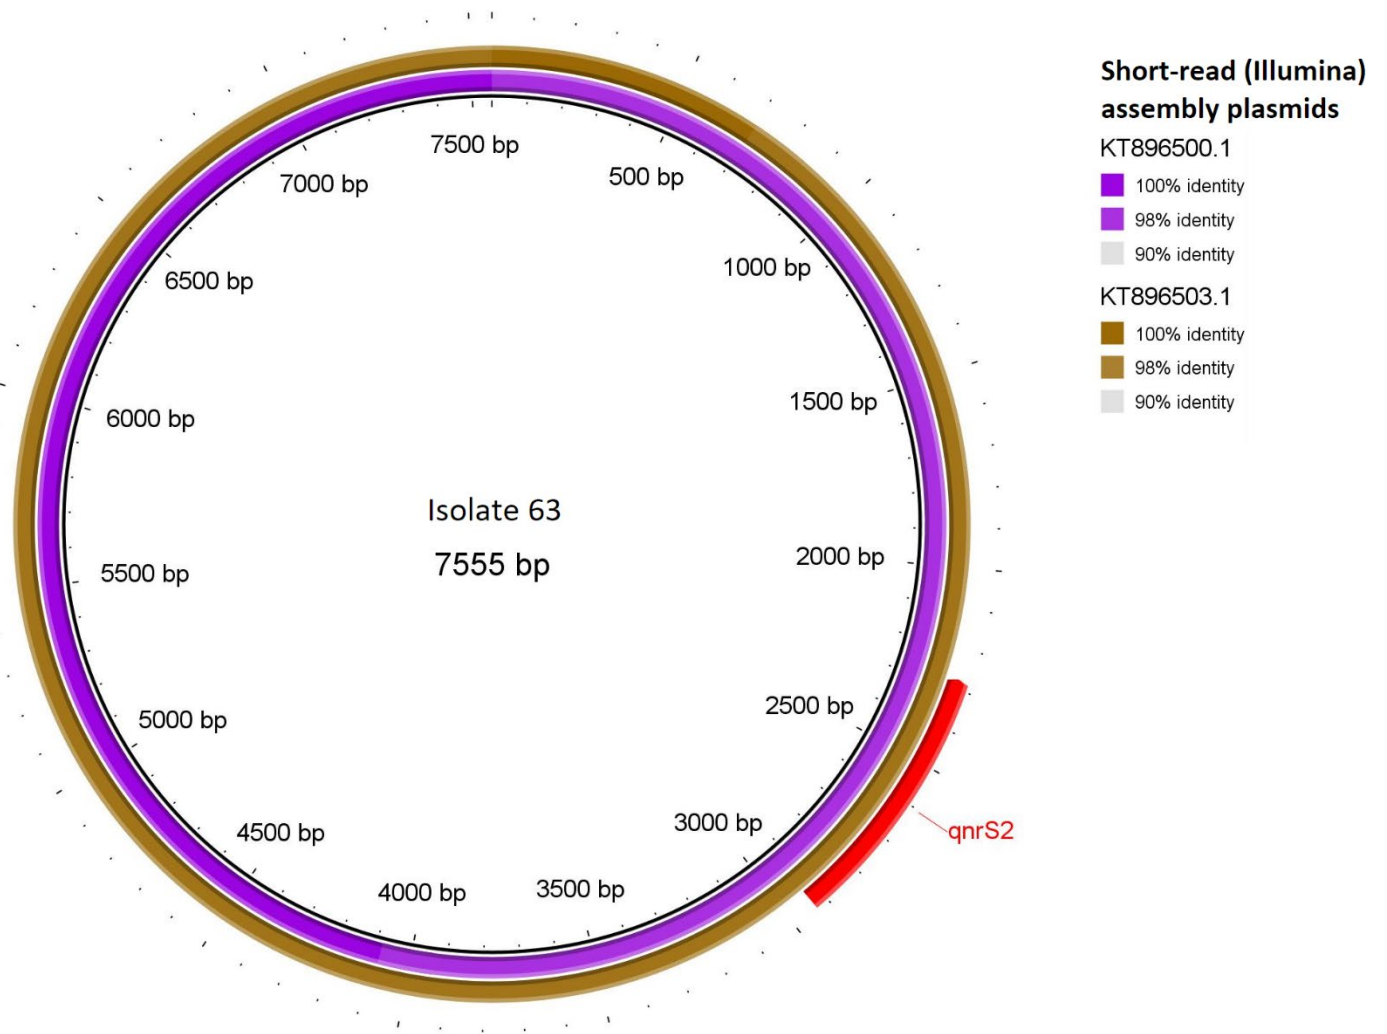

292

293

294 **Figure S4 –**

295 A BLAST ring alignment for short-read (Illumina) assembly plasmids and long-read (Pac-Bio)  
296 assembly plasmids harboring the *bla*<sub>CTX-M-27</sub> (indicated in yellow). The percentage of identity for  
297 each aligned sequence with the reference plasmid (EU855788.1; inner black circle) is indicated  
298 on the legend (\*In the reference EU855788.1, *bla*<sub>CTX-M-14</sub> was detected in the same location and  
299 not *bla*<sub>CTX-M-27</sub>).

300

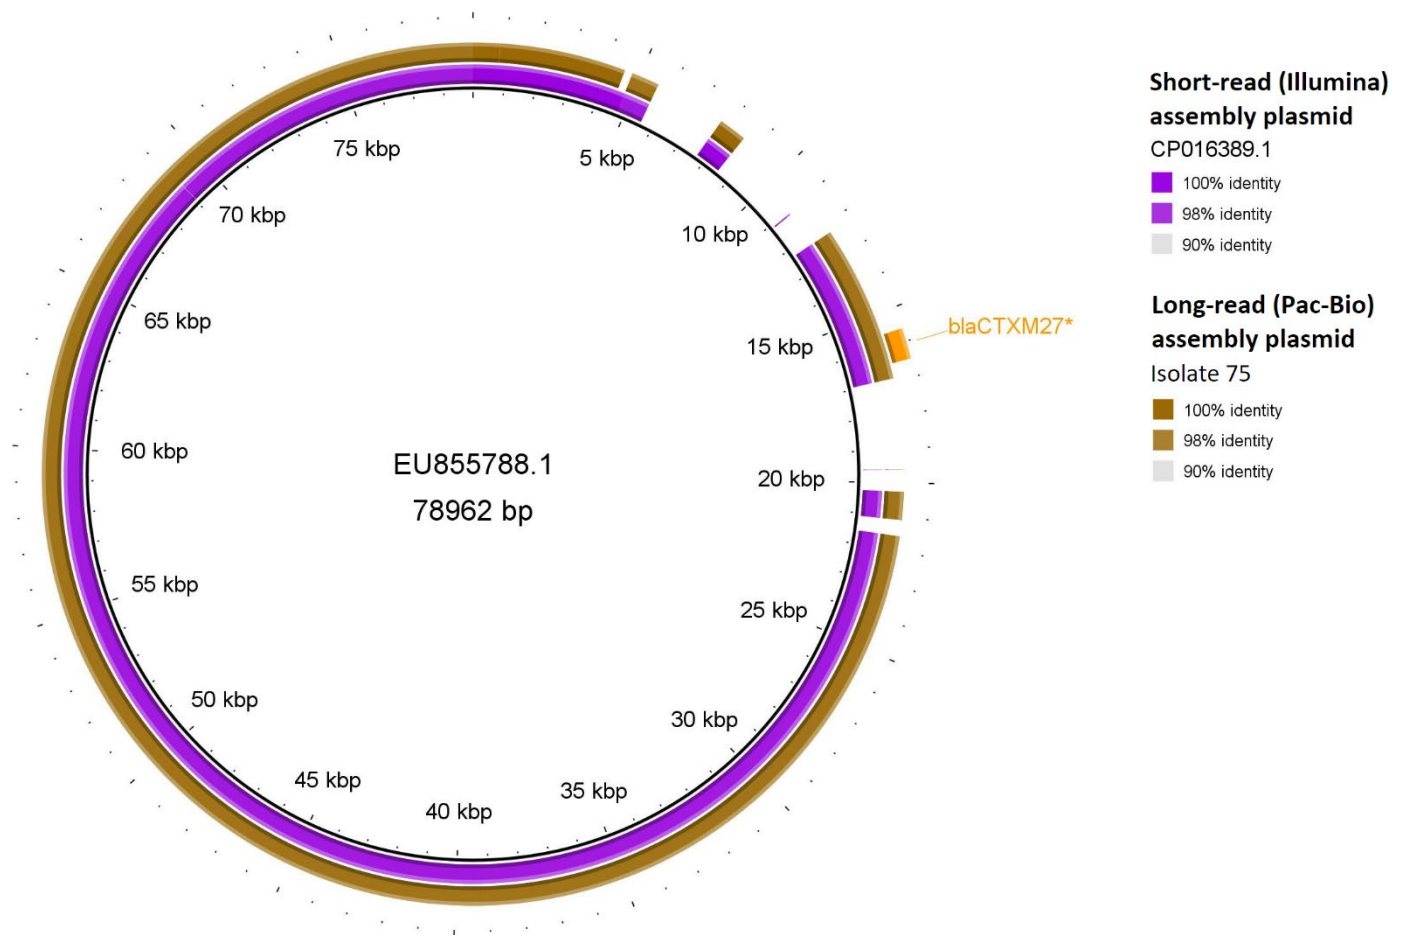

301

302

303

304 **Figure S5 –**

305 A BLAST ring alignment for short-read (Illumina) assembly plasmids and long-read (Pac-Bio)  
306 assembly plasmids harboring the *bla*<sub>CMY-2</sub> (indicated in yellow) in short-read assembly plasmids  
307 of group I. The percentage of identity for each aligned sequence with the reference plasmid  
308 (KP056256.1; inner black circle) is indicated on the legend.

309

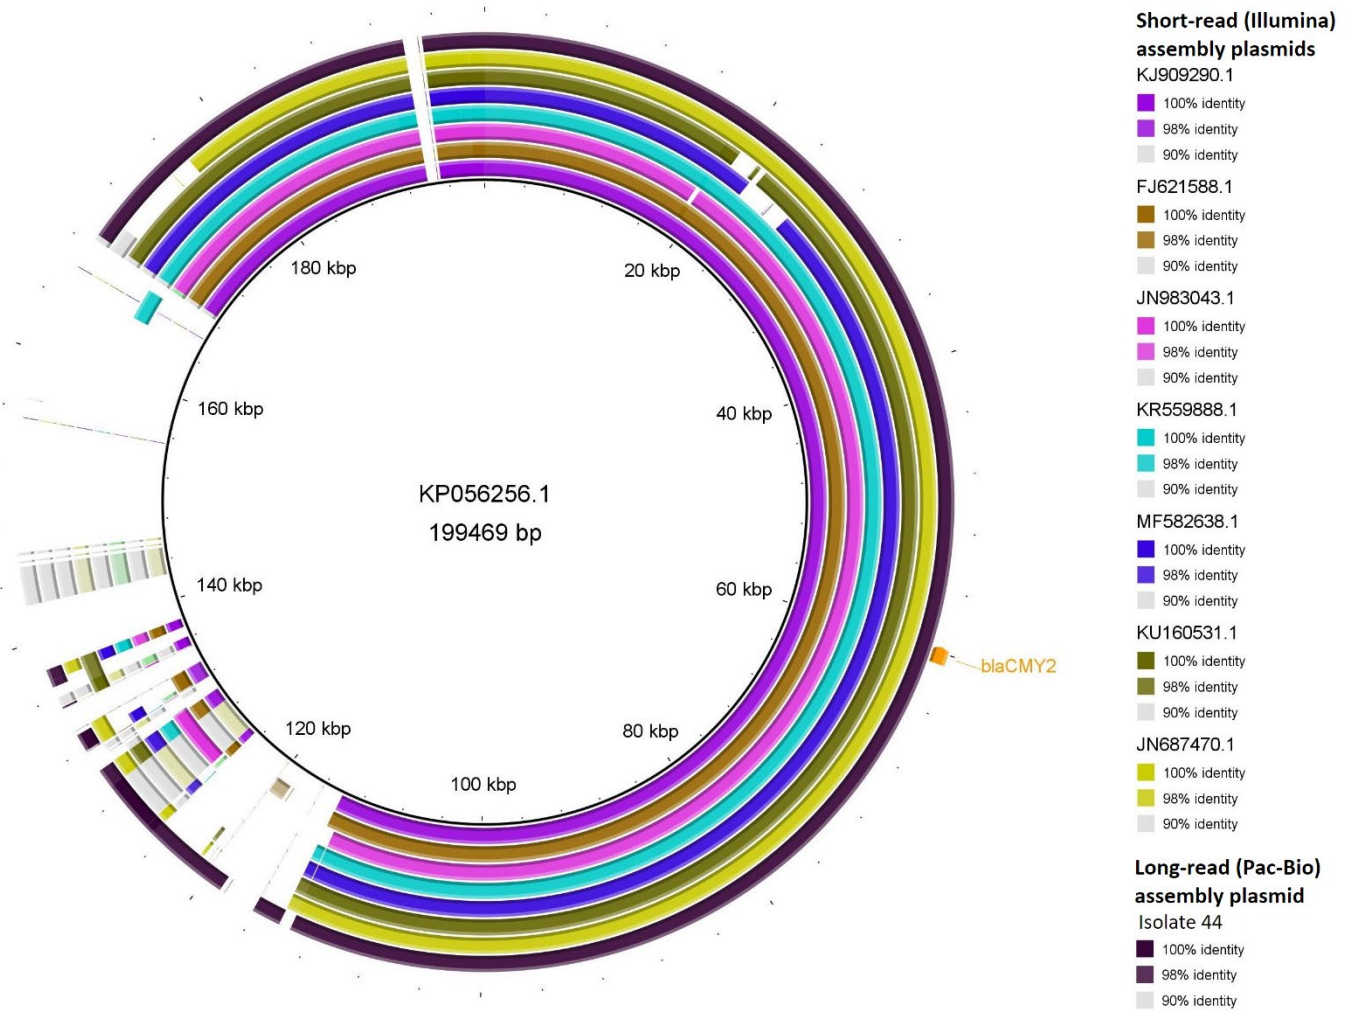

310

311

312

313 **Figure S6 –**

314 A BLAST ring alignment for short-read (Illumina) assembly plasmids and long-read (Pac-Bio)  
315 assembly plasmids harboring the *bla*<sub>CMY-2</sub> (indicated in yellow) in short-read assembly plasmids  
316 of group II. The percentage of identity for each aligned sequence with the reference plasmid  
317 (CP022064.1; inner black circle) is indicated on the legend.

318

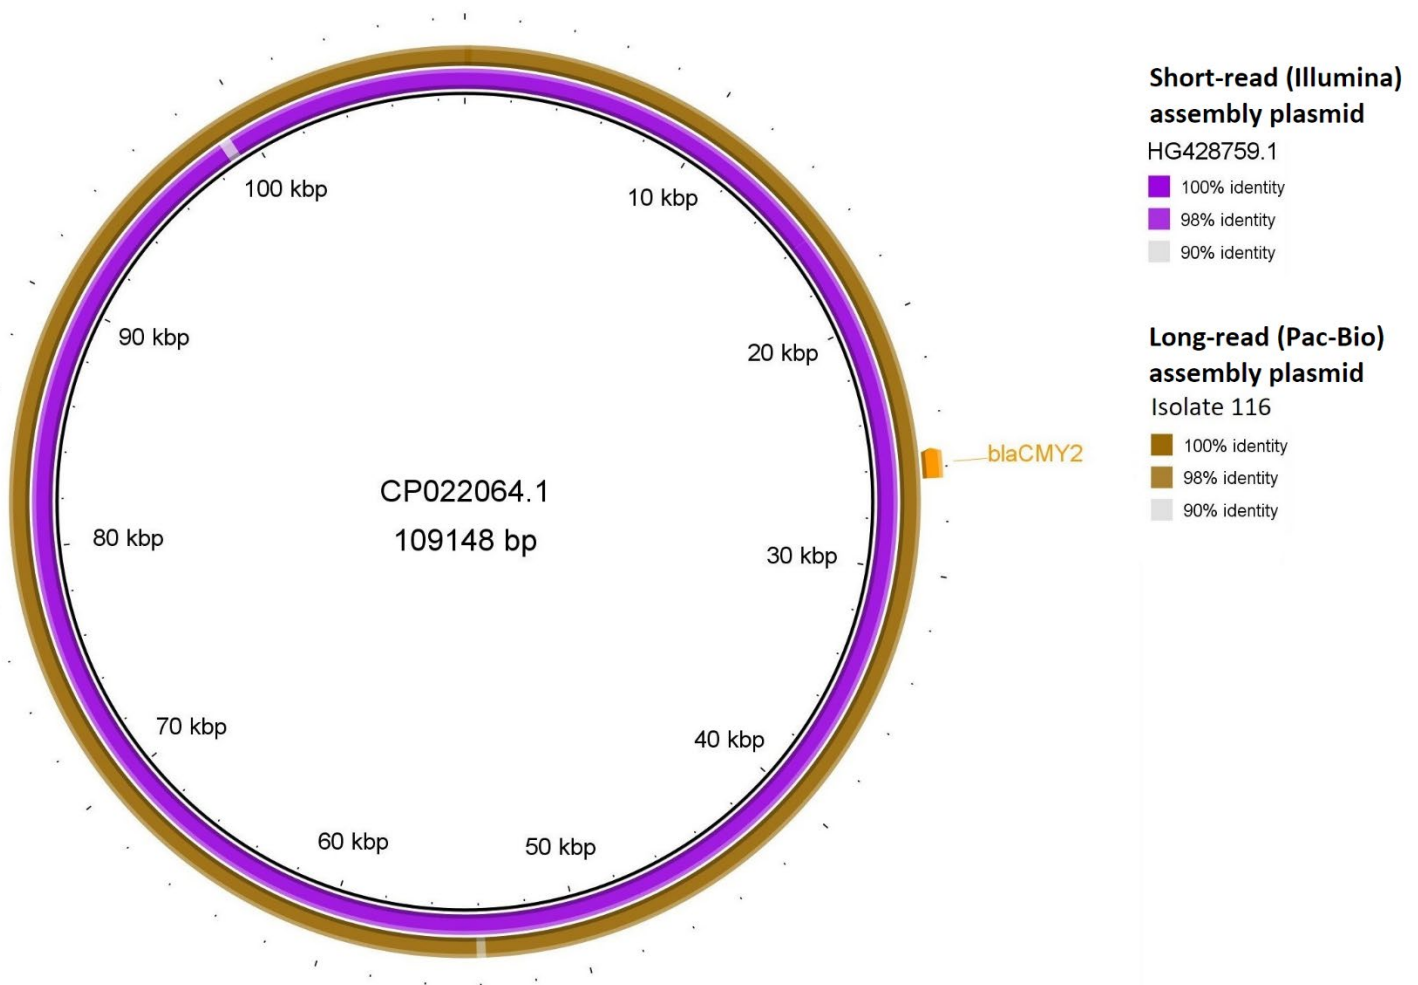

319

320

321



322 **Figure S7 –**

323 A BLAST ring alignment for short-read (Illumina) assembly plasmids and long-read (Pac-Bio)  
324 assembly plasmids harboring the *qnrB2*, *aac(6')Ib-cr* and *bla<sub>SHV-12</sub>* (indicated in the external  
325 circle in red, black and yellow, respectively). The percentage of identity for each aligned  
326 sequence with the reference plasmid (CP022064.1; inner black circle) is indicated on the legend.  
327

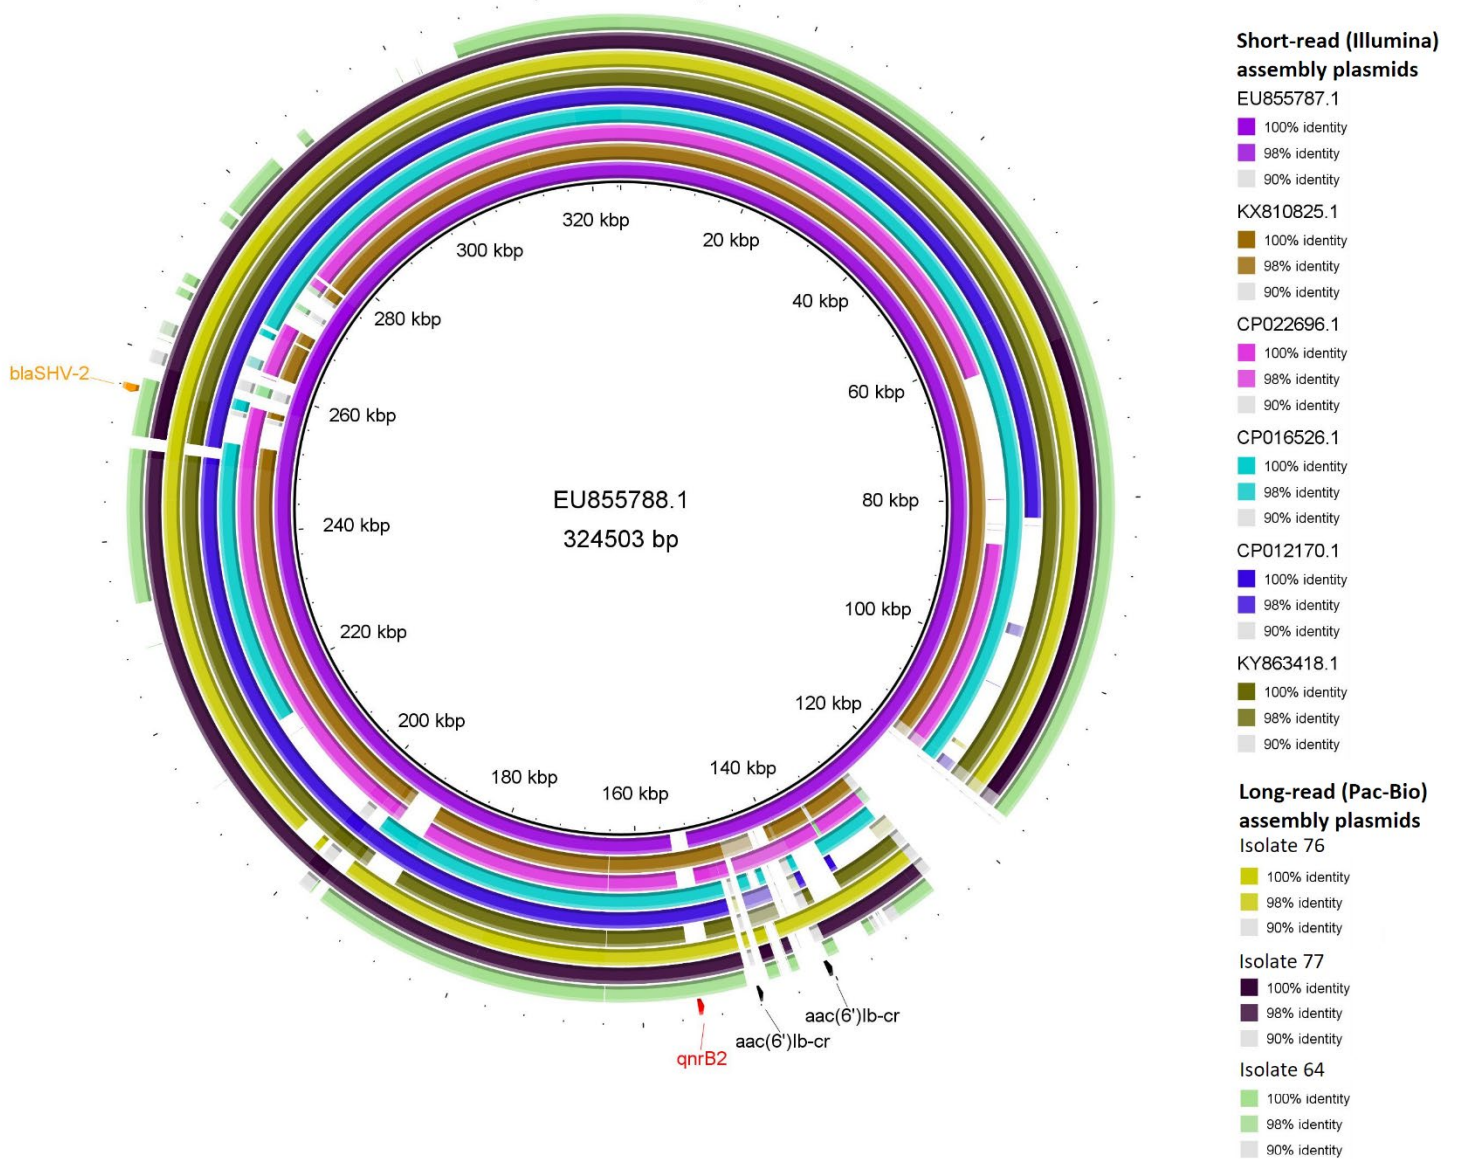

328

329 References

- 330 1. Elnekave E, Hong S, Mather AE, Boxrud D, Taylor AJ, Lappi V, Johnson TJ, Vannucci F,  
331 Davies P, Hedberg C, Perez A, Alvarez J. 2018. Salmonella enterica Serotype 4,[5],12:i:- in  
332 Swine in the United States Midwest: An Emerging Multidrug-Resistant Clade. Clin Infect  
333 Dis 66:877-885.
- 334 2. Yoshida CE, Kruczkiewicz P, Laing CR, Lingohr EJ, Gannon VP, Nash JH, Taboada EN.  
335 2016. The Salmonella In Silico Typing Resource (SISTR): An Open Web-Accessible Tool  
336 for Rapidly Typing and Subtyping Draft Salmonella Genome Assemblies. PLoS One  
337 11:e0147101.
- 338 3. Andrews S. 2010. FastQC: a quality control tool for high throughput sequence data.  
339 <http://www.bioinformatics.babraham.ac.uk/projects/fastqc>. Accessed
- 340 4. Bankevich A, Nurk S, Antipov D, Gurevich AA, Dvorkin M, Kulikov AS, Lesin VM,  
341 Nikolenko SI, Pham S, Prjibelski AD, Pyshkin AV, Sirotkin AV, Vyahhi N, Tesler G,  
342 Alekseyev MA, Pevzner PA. 2012. SPAdes: a new genome assembly algorithm and its  
343 applications to single-cell sequencing. J Comput Biol 19:455-77.
- 344 5. Gurevich A, Saveliev V, Vyahhi N, Tesler G. 2013. QUAST: quality assessment tool for  
345 genome assemblies. Bioinformatics 29:1072-5.
- 346 6. Langmead B, Trapnell C, Pop M, Salzberg SL. 2009. Ultrafast and memory-efficient  
347 alignment of short DNA sequences to the human genome. Genome Biol 10:R25.
- 348 7. Bushnell B. 2016. BBMap short-read aligner, and other bioinformatics tools,  
349 <http://sourceforge.net/projects/bbmap/>.



- 350 8. Hasman H, Saputra D, Sicheritz-Ponten T, Lund O, Svendsen CA, Frimodt-Moller N,  
351 Aarestrup FM. 2014. Rapid whole-genome sequencing for detection and characterization of  
352 microorganisms directly from clinical samples. *J Clin Microbiol* 52:139-46.
- 353 9. Larsen MV, Cosentino S, Lukjancenko O, Saputra D, Rasmussen S, Hasman H, Sicheritz-  
354 Ponten T, Aarestrup FM, Ussery DW, Lund O. 2014. Benchmarking of methods for  
355 genomic taxonomy. *J Clin Microbiol* 52:1529-39.
- 356 10. Zankari E, Hasman H, Cosentino S, Vestergaard M, Rasmussen S, Lund O, Aarestrup FM,  
357 Larsen MV. 2012. Identification of acquired antimicrobial resistance genes. *J Antimicrob*  
358 *Chemother* 67:2640-4.
- 359 11. Larsen MV, Cosentino S, Rasmussen S, Friis C, Hasman H, Marvig RL, Jelsbak L,  
360 Sicheritz-Ponten T, Ussery DW, Aarestrup FM, Lund O. 2012. Multilocus sequence typing  
361 of total-genome-sequenced bacteria. *J Clin Microbiol* 50:1355-61.
- 362 12. Carattoli A, Zankari E, Garcia-Fernandez A, Voldby Larsen M, Lund O, Villa L, Moller  
363 Aarestrup F, Hasman H. 2014. In silico detection and typing of plasmids using  
364 PlasmidFinder and plasmid multilocus sequence typing. *Antimicrob Agents Chemother*  
365 58:3895-903.
- 366 13. Altschul SF, Gish W, Miller W, Myers EW, Lipman DJ. 1990. Basic local alignment search  
367 tool. *J Mol Biol* 215:403-10.
- 368 14. Larsson A. 2014. AliView: a fast and lightweight alignment viewer and editor for large  
369 datasets. *Bioinformatics* 30:3276-8.
- 370 15. Quinlan AR, Hall IM. 2010. BEDTools: a flexible suite of utilities for comparing genomic  
371 features. *Bioinformatics* 26:841-2.

- 372 16. Li H, Handsaker B, Wysoker A, Fennell T, Ruan J, Homer N, Marth G, Abecasis G, Durbin  
373 R, Genome Project Data Processing S. 2009. The Sequence Alignment/Map format and  
374 SAMtools. *Bioinformatics* 25:2078-9.
- 375 17. Koboldt DC, Zhang Q, Larson DE, Shen D, McLellan MD, Lin L, Miller CA, Mardis ER,  
376 Ding L, Wilson RK. 2012. VarScan 2: somatic mutation and copy number alteration  
377 discovery in cancer by exome sequencing. *Genome Res* 22:568-76.
- 378 18. Tyson GH, Tate HP, Zhao S, Li C, Dessai U, Simmons M, McDermott PF. 2017.  
379 Identification of Plasmid-Mediated Quinolone Resistance in Salmonella Isolated from Swine  
380 Ceca and Retail Pork Chops in the United States. *Antimicrob Agents Chemother* 61.
- 381 19. Ross MG, Russ C, Costello M, Hollinger A, Lennon NJ, Hegarty R, Nusbaum C, Jaffe DB.  
382 2013. Characterizing and measuring bias in sequence data. *Genome Biol* 14:R51.
- 383 20. Salmela L, Rivals E. 2014. LoRDEC: accurate and efficient long read error correction.  
384 *Bioinformatics* 30:3506-14.
- 385 21. Wick RR, Judd LM, Gorrie CL, Holt KE. 2017. Unicycler: Resolving bacterial genome  
386 assemblies from short and long sequencing reads. *PLoS Comput Biol* 13:e1005595.
- 387 22. Wick RR, Schultz MB, Zobel J, Holt KE. 2015. Bandage: interactive visualization of de  
388 novo genome assemblies. *Bioinformatics* 31:3350-2.
- 389 23. Alikhan NF, Petty NK, Ben Zakour NL, Beatson SA. 2011. BLAST Ring Image Generator  
390 (BRIG): simple prokaryote genome comparisons. *BMC Genomics* 12:402.
- 391 24. Wickham H. 2015. stringr: Simple, Consistent Wrappers for Common String Operations.  
392 <https://CRAN.R-project.org/package=stringr>. Accessed
- 393 25. Wickham H, Francois, R., Henry, L., Müller, K. 2017. dplyr: A Grammar of Data  
394 Manipulation. R package version 0.7.4, <https://CRAN.R-project.org/package=dplyr>.

- 395 26. Dragulescu AA. 2014. xlsx: Read, write, format Excel 2007 and Excel 97/2000/XP/2003  
396 files. R package version 0.5.7, <https://CRAN.R-project.org/package=xlsx>.
- 397 27. R Core Team. 2016. R: A language and environment for statistical computing, Vienna,  
398 Austria. <https://www.R-project.org/>.
- 399 28. Frank E. 2018. Hmisc: Harrell Miscellaneous. R package version 4.1-1, [https://CRAN.R-](https://CRAN.R-project.org/package=Hmisc)  
400 [project.org/package=Hmisc](https://CRAN.R-project.org/package=Hmisc).
- 401 29. Chen H, Boutros PC. 2011. VennDiagram: a package for the generation of highly-  
402 customizable Venn and Euler diagrams in R. BMC Bioinformatics 12:35.
- 403 30. Auguie B. 2012. gridExtra: functions in Grid graphics. R package version 23 1.
- 404 31. Dohoo IR, Martin, S.W., Stryhn, H. 2012. Linear Regression, p 359-400, Methods in  
405 Epidemiologic Research. VER Inc., Charlottetown, Prince EdwardIsland, Canada.
- 406 32. Abouzeed YM, Baucheron S, Cloeckert A. 2008. ramR mutations involved in efflux-  
407 mediated multidrug resistance in Salmonella enterica serovar Typhimurium. Antimicrob  
408 Agents Chemother 52:2428-34.
- 409 33. Olliver A, Valle M, Chaslus-Dancla E, Cloeckert A. 2004. Role of an acrR mutation in  
410 multidrug resistance of in vitro-selected fluoroquinolone-resistant mutants of Salmonella  
411 enterica serovar Typhimurium. FEMS Microbiol Lett 238:267-72.
- 412 34. Hopkins KL, Davies RH, Threlfall EJ. 2005. Mechanisms of quinolone resistance in  
413 Escherichia coli and Salmonella: recent developments. Int J Antimicrob Agents 25:358-73.
- 414 35. Capoor MR, Nair D, Walia NS, Routela RS, Grover SS, Deb M, Aggarwal P, Pillai PK,  
415 Bifani PJ. 2009. Molecular analysis of high-level ciprofloxacin resistance in Salmonella  
416 enterica serovar Typhi and S. Paratyphi A: need to expand the QRDR region? Epidemiol  
417 Infect 137:871-8.

- 418 36. Eaves DJ, Randall L, Gray DT, Buckley A, Woodward MJ, White AP, Piddock LJ. 2004.  
419 Prevalence of mutations within the quinolone resistance-determining region of *gyrA*, *gyrB*,  
420 *parC*, and *parE* and association with antibiotic resistance in quinolone-resistant *Salmonella*  
421 *enterica*. *Antimicrob Agents Chemother* 48:4012-5.
- 422 37. Wasyl D, Hoszowski A, Zajac M. 2014. Prevalence and characterisation of quinolone  
423 resistance mechanisms in *Salmonella* spp. *Vet Microbiol* 171:307-14.
- 424 38. Akiyama T, Khan AA. 2012. Molecular characterization of strains of fluoroquinolone-  
425 resistant *Salmonella enterica* serovar Schwarzengrund carrying multidrug resistance isolated  
426 from imported foods. *J Antimicrob Chemother* 67:101-10.
- 427
